# Supplementary material
Source: PubMed Central journal article supplement (PMC2831683)

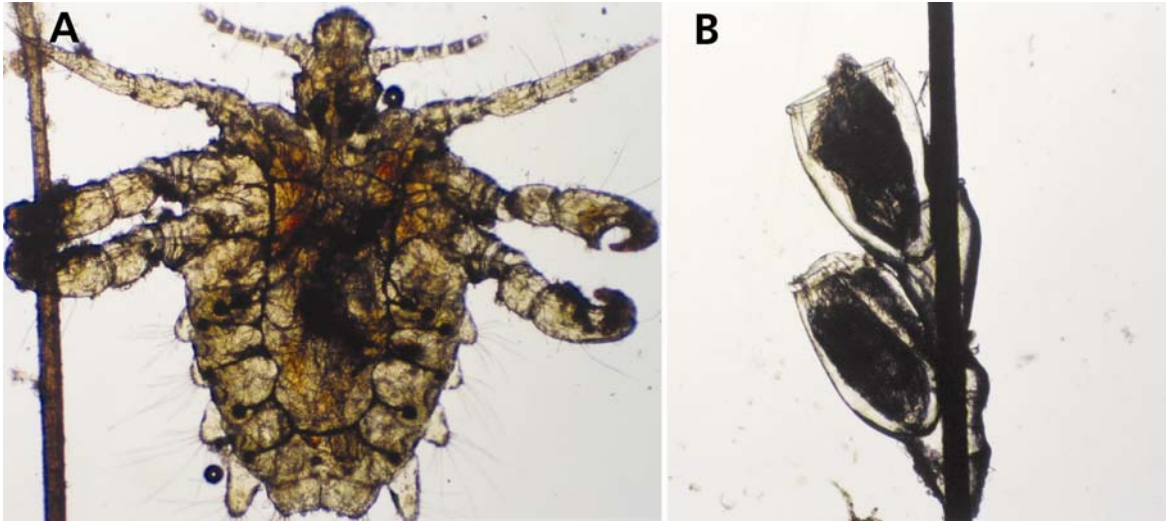

**Appendix 1:** Microscopic view of (A) crab-shaped *Phthirus pubis* and (B) two nits attached to an eyelash.

Supplement: 090793_1.pdf [file 090793_1.pdf]
